# Supplementary material
Source: MDPI journal article supplement (https://www.mdpi.com/2073-4441/10/7/943)
Supplement: s1 [file s1]

**Table 1** Equations for calculating the fifteen level individual indices.

| Individual index level E | Description                                                                                                 | Equation                                                  | Parameter                                                                                                                                                      | Remark                                                                                                                                                                                                                                                                                                                                |
|--------------------------|-------------------------------------------------------------------------------------------------------------|-----------------------------------------------------------|----------------------------------------------------------------------------------------------------------------------------------------------------------------|---------------------------------------------------------------------------------------------------------------------------------------------------------------------------------------------------------------------------------------------------------------------------------------------------------------------------------------|
| $E_1$                    | $E_1$ is average of lowest ten-day water level in a year                                                    | $E_1 = \overline{wl_i} = \frac{\sum_{i=1}^{10} wl_i}{10}$ | $wl_i$ is the water level of day i during the lowest ten days                                                                                                  | Owning to the fluctuated water level during dry season, two thresholds including “low threshold” and “high threshold” values of $E_1$ were given, that is, if the average of lowest ten days water level was higher than the “high threshold” 10.25, or lower than “low threshold”, the water level would be regarded as “unhealthy”. |
| $E_2$                    | $E_2$ is average of highest ten-day water level in a year                                                   | $E_2 = \overline{wl_i} = \frac{\sum_{i=1}^{10} wl_i}{10}$ | $wl_i$ is the water level of day i during the highest ten days                                                                                                 |                                                                                                                                                                                                                                                                                                                                       |
| $E_3$                    | Tributary connectivity is measured by the percentage of entrances that is directly connected to Lake Poyang | $E_3 = \frac{n}{N}$                                       | $n$ is the number of entrances directly connected to Lake Poyang, and $N$ means the total number of entrances including the connected and blocked ones.        | /                                                                                                                                                                                                                                                                                                                                     |
| $E_4$                    | Shrinking rate of lake area                                                                                 | $E_4 = \frac{A_1}{A_2}$                                   | $A_1$ is current lake area, and $A_2$ is historical lake area. Both of the two lake areas were selected when the water level reached 19 m at Hukou station, in |                                                                                                                                                                                                                                                                                                                                       |

---

|       |                                                                                                                                                                           |                                          |                                                                                                                                                                                                                                                                                                                                                                                                                                                                                                                                                                                                                                                                                                                                                                          |                                                                                                                                                                                                                                  |
|-------|---------------------------------------------------------------------------------------------------------------------------------------------------------------------------|------------------------------------------|--------------------------------------------------------------------------------------------------------------------------------------------------------------------------------------------------------------------------------------------------------------------------------------------------------------------------------------------------------------------------------------------------------------------------------------------------------------------------------------------------------------------------------------------------------------------------------------------------------------------------------------------------------------------------------------------------------------------------------------------------------------------------|----------------------------------------------------------------------------------------------------------------------------------------------------------------------------------------------------------------------------------|
| $E_5$ | Annual runoff                                                                                                                                                             | $E_5 = \sum_i^{n=365} q_i * 24 * 3600$   | <p>which the maximum lake area may appear.</p> <p><math>q_i</math> is daily runoff at Hukou station. <math>E_5</math> is the summation of runoff over an entire year.</p>                                                                                                                                                                                                                                                                                                                                                                                                                                                                                                                                                                                                | /                                                                                                                                                                                                                                |
| $E_6$ | The ratio of protected to unprotected shoreline (physical characteristics) modified by the proportion of structures that are biologically compatible (biological impacts) | $SAI(E_6) = 1 - (P_{ratio} * B_{ratio})$ | <p><math>P_{ratio}</math> is the ratio of the linear length of armored shoreline relative to the total linear length of the shoreline. A value of zero would represent an unprotected natural shoreline, and a value of one would represent a highly modified or 100% engineered shoreline. The biological shoreline indicator <math>B_{ratio}</math> is the ratio of the linear length of biologically incompatible structures (shore perpendicular structures, vertical sheet pile, or concrete walls) relative to the total linear length of the protected shoreline. A value of zero represents the lack of biological or ecological impact (high compatibility), and a value of one represents significant biological or ecological impact (low compatibility).</p> | <p>The resulting SAI ranges from zero, which represents a highly altered biologically incompatible shoreline, to one, which represents a biologically compatible shoreline (even though the shoreline may still be armored).</p> |
| $E_7$ | Concentrations of TN                                                                                                                                                      | /                                        | Annual averages were based on all the sites and all four seasons. We took a straight average of all                                                                                                                                                                                                                                                                                                                                                                                                                                                                                                                                                                                                                                                                      | /                                                                                                                                                                                                                                |

---

|                      |                                                       |                               |                                                                                                                                                    |                                                                                                                                                                                                                       |
|----------------------|-------------------------------------------------------|-------------------------------|----------------------------------------------------------------------------------------------------------------------------------------------------|-----------------------------------------------------------------------------------------------------------------------------------------------------------------------------------------------------------------------|
|                      |                                                       |                               | sites for each time period and then averaged the time periods to get the annual values.                                                            |                                                                                                                                                                                                                       |
| $E_8$                | Concentrations of TP                                  | /                             | /                                                                                                                                                  | /                                                                                                                                                                                                                     |
| $E_9$                | Concentrations of EC                                  | /                             | /                                                                                                                                                  | /                                                                                                                                                                                                                     |
| $E_{10}$             | TLI                                                   | /                             | /                                                                                                                                                  | TLI is calculated based on concentration of Chl <i>a</i> , TN, TP, COD, and SD according to the relation-weighting synthetic trophic status index described by Wang et al. [1].                                       |
| $E_{11,12,13,14,15}$ | Concentrations of organic pollutants and heavy metals | /                             | /                                                                                                                                                  | The data of organic pollutants and heavy metals applied in this paper were collected from the latest published studies [2,3]                                                                                          |
| $E_{16}$             | The ratio of blue-green algae biomass                 | $E_{16} = N_b / N$            | $N_b$ is the biomass of blue-green algae, and $N$ is total algae biomass.                                                                          | /                                                                                                                                                                                                                     |
| $E_{17,19,20}$       | Berger–Parker index                                   | $E_{17,19,20} = n_{\max} / N$ | $n_{\max}$ is the density of the most-dominant species, and $N$ is the total density of phytoplankton, zooplankton, and benthic macroinvertebrate. | Berger–Parker index is one of the most widely accepted and even metrics for measuring the diversity and stability of ecosystem. Therefore, it was also retained in zooplankton and benthic macroinvertebrate aspects. |
| $E_{18}$             | The ratio of the large Daphnia                        | $E_{18} = N_D / N$            | $N_D$ is the density of large Daphnia, and $N$ is the                                                                                              | The large Daphnia was often introduced in                                                                                                                                                                             |

|          | population density                                    |                                                           | total density of zooplankton.                                                                                                    | the restoration area to control eutrophication, because nutrient-limited algae are generally accepted as a low-quality food source for herbivorous zooplankton [4]. Therefore, the high density of large Daphnia indicates the low risk of blue-green algae bloom |
|----------|-------------------------------------------------------|-----------------------------------------------------------|----------------------------------------------------------------------------------------------------------------------------------|-------------------------------------------------------------------------------------------------------------------------------------------------------------------------------------------------------------------------------------------------------------------|
| $E_{21}$ | Total tolerance value                                 | $FBI(E_{21}) = \sum_{i=1}^n F_i * N_i / \sum_{i=1}^n N_i$ | $F_i$ is defined as the tolerance value of benthic macroinvertebrate i, and $N_i$ is the density of benthic macroinvertebrate i. | Tolerance values were obtained from published studies [5-7]                                                                                                                                                                                                       |
| $E_{22}$ | Area of wetland plants                                | /                                                         | /                                                                                                                                | /                                                                                                                                                                                                                                                                 |
| $E_{23}$ | The ratio of four Chinese carps                       | $E_{23} = W_f / W$                                        | $W_f$ is the weight of four Chinese carps, and $W$ is the total weight of fish.                                                  | /                                                                                                                                                                                                                                                                 |
| $E_{24}$ | The proportion of the low-age groups of Chinese carps | $E_{24} = W_y / W$                                        | $W_y$ is the weight of fish in years 1 to 2, and $W$ is the total weight of fish.                                                | /                                                                                                                                                                                                                                                                 |
| $E_{25}$ | The number of wintering birds                         | /                                                         | /                                                                                                                                | /                                                                                                                                                                                                                                                                 |
| $E_{26}$ | The number of white crane                             | /                                                         | /                                                                                                                                | /                                                                                                                                                                                                                                                                 |

---

|          |                                                                                                                               |                             |                                                                                                                                                      |                                                                                                                                                                        |
|----------|-------------------------------------------------------------------------------------------------------------------------------|-----------------------------|------------------------------------------------------------------------------------------------------------------------------------------------------|------------------------------------------------------------------------------------------------------------------------------------------------------------------------|
| $E_{27}$ | The ratio of water function zones that reached the drinking water qualification standard                                      | $E_{27} = N_w / N$          | $N_w$ is the number of water function zones reaching the drinking water qualification standard, and $N$ is the total number of water function zones. | /                                                                                                                                                                      |
| $E_{28}$ | The ratio of infected snails                                                                                                  | $E_{28} = N_i / N$          | $N_i$ is the number of infected snails, and $N$ is the total number of snails.                                                                       | /                                                                                                                                                                      |
| $E_{29}$ | The ratio of marshlands with the snails                                                                                       | $E_{29} = N_m / N$          | $N_m$ is area of surveyed marshlands with the snails, and $N$ is the total area of surveyed marshlands.                                              | /                                                                                                                                                                      |
| $E_{30}$ | Flood storage capacity, that is, difference in discharge between inflows and outflow during the flood periods (April to June) | $E_{30} = S_{in} - S_{out}$ | $S_{in}$ is the runoff of all the inflows, and $S_{out}$ is the runoff of outflow during the flood periods (April to June).                          | /                                                                                                                                                                      |
| $E_{31}$ | Amount of sand mining with government approval                                                                                | /                           | /                                                                                                                                                    | /                                                                                                                                                                      |
| $E_{32}$ | Area ratio of dish-shaped sub-lakes under management                                                                          | $E_{32} = A_m / A$          | $A_m$ is the area of dish-shaped sub-lakes managed by protected organizations, and $A$ is the total area of the dish-shaped sub-lakes.               | Until now, there were Lake Zhanbei hu, Lake Shahu, Lake Dahuchi, Lake Changhuchi, Lake Meixihu, and Lake Zhushihu, which are managed by local protected organizations. |

---

---

## References

1. Wang, M.C.; Liu, X.Q.; Zhang, J.H. Evaluate method and classification standard on lake eutrophication. *Environ. Monit. China*. **2002**, *18*, 47-49 (in Chinese).
2. Zhang, H.; Jiang, Y.H.; Ding, M.J.; Xie, Z.L. Level, source identification, and risk analysis of heavy metal in surface sediments from river-lake ecosystems in the Poyang Lake, China. *Environ. Sci. Pollut. Res.* **2017**, *24*, 21902-21916, doi:10.1007/s11356-017-9855-y.
3. Zhi, H.; Zhao, Z.; Zhang, L. The fate of polycyclic aromatic hydrocarbons (PAHs) and organochlorine pesticides (OCPs) in water from Poyang Lake, the largest freshwater lake in China. *Chemosphere*. **2015**, *119*, 1134-1140, doi:10.1016/j.chemosphere.2014.09.054.
4. Boersma, M. The nutritional quality of P-limited algae for Daphnia. *Limnol. Oceanogr.* **2000**, *45*, 1157-1161, doi:10.4319/lo.2000.45.5.1157.
5. Huang, Q.; Gao, J.F.; Cai, Y.J.; Yin, H.B.; Gao, Y.N.; Zhao, J.H.; Liu, L.Z.; Huang, J.C. Development and application of benthic macroinvertebrate-based multimetric indices for the assessment of streams and rivers in the Taihu Basin, China. *Ecol. Indic.* **2015**, *48*, 649-659, doi:10.1016/j.ecolind.2014.09.014.
6. Wang, J.G.; Huang, H.B.; Yang, M.X.; Tang, Z.H.; Zhao, F.X. Tolerance values of benthic macroinvertebrates and bioassessment of water quality in the Lushan Nature Reserve. *Chin. J. Appl. Environ. Biol.* **2003**, *9*, 279-284 (in Chinese).
7. Wang, B.X.; Yang, L.F. A study on tolerance values of the benthic macroinvertebrate taxa in eastern China. *Acta Ecol. Sin.* **2004**, *24*, 2768-2775 (in Chinese).
